# Supplementary material
Source: MDPI journal article supplement (https://www.mdpi.com/2073-4441/14/20/3297)
Supplement: s1 [file s1]

## Supplementary Materials for:

# Prediction of Wastewater Treatment Plant Performance using Multivariate Statistical Analysis: A Case Study of Regional Sewage Treatment Plant in Melaka, Malaysia

Sofiah Rahmat <sup>1,3</sup>, Wahid Ali Hamood Altowayti <sup>2,\*</sup>, Norzila Othman <sup>3,\*</sup>, Syazwani Mohd Asharuddin <sup>3</sup>, Faisal Saeed <sup>4</sup>, Shadi Basurra <sup>4</sup>, Taiseer Abdalla Elfadil Eisa <sup>5</sup>, Shafinaz Shahir <sup>2</sup>

<sup>1</sup> Ministry of Health Malaysia, Kompleks E, Pusat Pentadbiran Kerajaan Persekutuan 62590 Putrajaya, Malaysia

<sup>2</sup> Department of Biosciences, Faculty of Science, Universiti Teknologi Malaysia, Skudai, Malaysia

<sup>3</sup> Faculty of Civil Engineering and Built Environment, Universiti Tun Hussein Onn Malaysia, 86400 Parit Raja, Johor, Malaysia

<sup>4</sup> DAAI Research Group, Department of Computing and Data Science, School of Computing and Digital Technology, Birmingham City University, Birmingham B4 7Xg, UK

<sup>5</sup> Department of Information System-Girls Section, King Khalid University, Mahayil, 62529 Saudi Arabia

\* Correspondence: ahawahid2@live.utm.my (W.A.H.A.); norzila@uthm.edu.my (N.O.)

Table S1. The relationships between the variables were examined by the Pearson correlation matrix.

| Attribute            | PC1   | PC2   | PC3   | PC4   | PC5   |
|----------------------|-------|-------|-------|-------|-------|
| BOD <sub>i</sub>     | 0.091 | 0.357 | 0.002 | 0.001 | 0.056 |
| COD <sub>i</sub>     | 0.183 | 0.670 | 0.006 | 0.001 | 0.008 |
| TSS <sub>i</sub>     | 0.188 | 0.503 | 0.033 | 0.000 | 0.003 |
| Ammonia <sub>i</sub> | 0.108 | 0.153 | 0.145 | 0.038 | 0.111 |
| pH <sub>i</sub>      | 0.056 | 0.020 | 0.191 | 0.027 | 0.074 |
| OG <sub>i</sub>      | 0.177 | 0.343 | 0.000 | 0.000 | 0.004 |
| BOD <sub>e</sub>     | 0.474 | 0.092 | 0.002 | 0.057 | 0.000 |
| COD <sub>e</sub>     | 0.539 | 0.194 | 0.070 | 0.026 | 0.005 |
| TSS <sub>e</sub>     | 0.548 | 0.071 | 0.015 | 0.084 | 0.001 |
| Ammonia <sub>e</sub> | 0.298 | 0.061 | 0.120 | 0.000 | 0.000 |
| pH <sub>e</sub>      | 0.004 | 0.011 | 0.115 | 0.149 | 0.377 |
| OG <sub>e</sub>      | 0.004 | 0.001 | 0.132 | 0.004 | 0.304 |
| TEMP <sub>e</sub>    | 0.027 | 0.004 | 0.227 | 0.029 | 0.001 |
| Nitrate <sub>i</sub> | 0.008 | 0.009 | 0.001 | 0.565 | 0.119 |
| Nitrate <sub>e</sub> | 0.000 | 0.022 | 0.395 | 0.079 | 0.000 |
| MLSS                 | 0.000 | 0.014 | 0.054 | 0.210 | 0.002 |
| WWQI                 | 0.762 | 0.186 | 0.011 | 0.000 | 0.001 |

Table S2. Pearson correlation matrix for wastewater quality parameters for all sampling points

|                                | BOD<br>influent | COD<br>influent | TSS<br>influent | NH <sub>3</sub><br>influent | BOD<br>effluent | COD<br>effluent | TSS<br>effluent | NH <sub>3</sub><br>effluent |
|--------------------------------|-----------------|-----------------|-----------------|-----------------------------|-----------------|-----------------|-----------------|-----------------------------|
| BOD <sub>i</sub>               | 1.0             | 0.534           | 0.397           | 0.214                       | 0.001           | -0.006          | -0.085          | 0.012                       |
| COD <sub>i</sub>               | 0.534           | 1.0             | 0.841           | 0.350                       | -0.045          | 0.047           | -0.107          | -0.025                      |
| TSS <sub>i</sub>               | 0.397           | 0.841           | 1.0             | 0.268                       | -0.092          | -0.046          | -0.110          | 0.002                       |
| NH <sub>3i</sub>               | 0.214           | 0.350           | 0.268           | 1.0                         | -0.167          | 0.011           | -0.106          | -0.210                      |
| PH <sub>i</sub>                | 0.068           | 0.199           | 0.196           | 0.055                       | -0.023          | -0.177          | -0.070          | -0.045                      |
| OG <sub>i</sub>                | 0.402           | 0.566           | 0.451           | 0.271                       | -0.122          | -0.092          | -0.094          | -0.054                      |
| BOD <sub>e</sub>               | 0.001           | -0.045          | -0.092          | -0.167                      | 1.0             | 0.582           | 0.416           | 0.326                       |
| COD <sub>e</sub>               | -0.006          | 0.047           | -0.046          | 0.011                       | 0.582           | 1.0             | 0.474           | 0.340                       |
| TSS <sub>e</sub>               | -0.085          | -0.107          | -0.110          | -0.106                      | 0.416           | 0.474           | 1.0             | 0.452                       |
| NH <sub>3e</sub>               | 0.012           | -0.025          | 0.002           | -0.210                      | 0.326           | 0.340           | 0.452           | 1.0                         |
| PH <sub>e</sub>                | -0.034          | 0.031           | 0.031           | -0.002                      | 0.167           | 0.068           | -0.054          | 0.131                       |
| OG <sub>e</sub>                | -0.063          | -0.092          | -0.056          | 0.098                       | 0.023           | 0.025           | 0.033           | 0.002                       |
| TEMP <sub>e</sub>              | -0.071          | 0.088           | 0.065           | 0.114                       | -0.070          | 0.003           | -0.139          | -0.113                      |
| NO <sub>3</sub> N <sub>i</sub> | -0.009          | -0.006          | 0.021           | 0.120                       | -0.022          | -0.043          | 0.256           | 0.071                       |
| NO <sub>3</sub> N <sub>e</sub> | 0.127           | 0.057           | -0.049          | 0.166                       | 0.036           | 0.230           | -0.106          | -0.129                      |
| MLSS                           | 0.015           | 0.054           | 0.017           | 0.107                       | 0.035           | 0.110           | -0.024          | -0.035                      |
| WWQI                           | 0.041           | 0.024           | 0.089           | 0.062                       | -0.678          | -0.906          | -0.791          | -0.454                      |
